# Supplementary material
Source: publisher site journal article supplement (https://www.oncotarget.com/article/28492)
Supplement: Supplementary file 1 [file 28492]

## Addendum

**Addendum: Total lesion glycolysis in oral squamous cell carcinoma as a biomarker derived from pre-operative FDG PET/CT outperforms established prognostic factors in a newly developed multivariate prediction model****Gerrit Spanier<sup>1</sup>, Daniela Weidt<sup>2</sup>, Dirk Hellwig<sup>2</sup>, Johannes K.H. Meier<sup>1</sup>, Torsten E. Reichert<sup>1</sup> and Jirka Grosse<sup>2</sup>**<sup>1</sup>Department of Cranio-Maxillofacial Surgery, University Hospital Regensburg, Regensburg, Germany<sup>2</sup>Department of Nuclear Medicine, University Hospital Regensburg, Regensburg, Germany**Published:****Copyright:** © 2023 Spanier et al. This is an open access article distributed under the terms of the [Creative Commons Attribution License](#) (CC BY 4.0), which permits unrestricted use, distribution, and reproduction in any medium, provided the original author and source are credited.**This article has an addendum:** No funding was used for this publication.Original article: Oncotarget. 2021; 12:37–48. <https://doi.org/10.18632/oncotarget.27857>
